# Supplementary material for: Age-related changes in the local milieu of inflamed tissues cause aberrant neutrophil trafficking and subsequent remote organ damage
Source: PubMed Central journal article supplement (PMC8284598; doi:10.1016/j.immuni.2021.04.025), 2021-07-13
Supplement: mmc1.pdf [file mmc1.pdf]

**Supplemental information**

**Age-related changes in the local milieu of  
inflamed tissues cause aberrant neutrophil  
trafficking and subsequent remote organ damage**

**Anna Barkaway, Loïc Rolas, Régis Joulia, Jennifer Bodkin, Tchern Lenn, Charlotte Owen-Woods, Natalia Reglero-Real, Monja Stein, Laura Vázquez-Martínez, Tamara Girbl, Robin N. Poston, Matthew Golding, Rebecca S. Saleeb, Aude Thiriot, Ulrich H. von Andrian, Johan Duchene, Mathieu-Benoit Voisin, Cleo L. Bishop, David Voehringer, Axel Roers, Antal Rot, Tim Lämmermann, and Sussan Nourshargh**

Figure S1

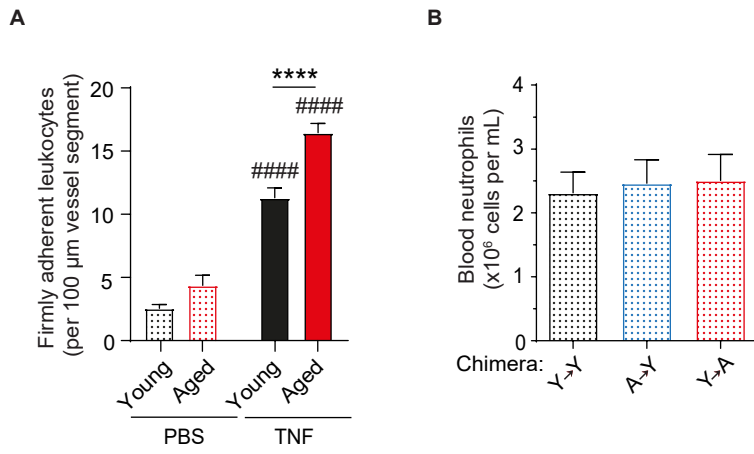

**Figure S1 (Related to Figure 1). Leukocyte adhesion responses in TNF-stimulated venules of WT mice and chimeric mice characterization. (A)** Young (2-4 months) and aged ( $\geq 18$  months) mice were treated intrascrotally (i.s.) with PBS or TNF and leukocyte firm adhesion in cremasteric post-capillary venules quantified by brightfield IVM ( $n=3-7$  mice/group). **(B)** Total neutrophil blood counts in chimeric mice (as generated in Figure 1H) at 4 weeks post irradiation and bone marrow transfer ( $n \geq 10$  mice/group). Means  $\pm$  SEM, #### $p < 0.0001$  as compared to age-matched controls, \*\*\*\* $p < 0.0001$  as indicated.

**Figure S2**

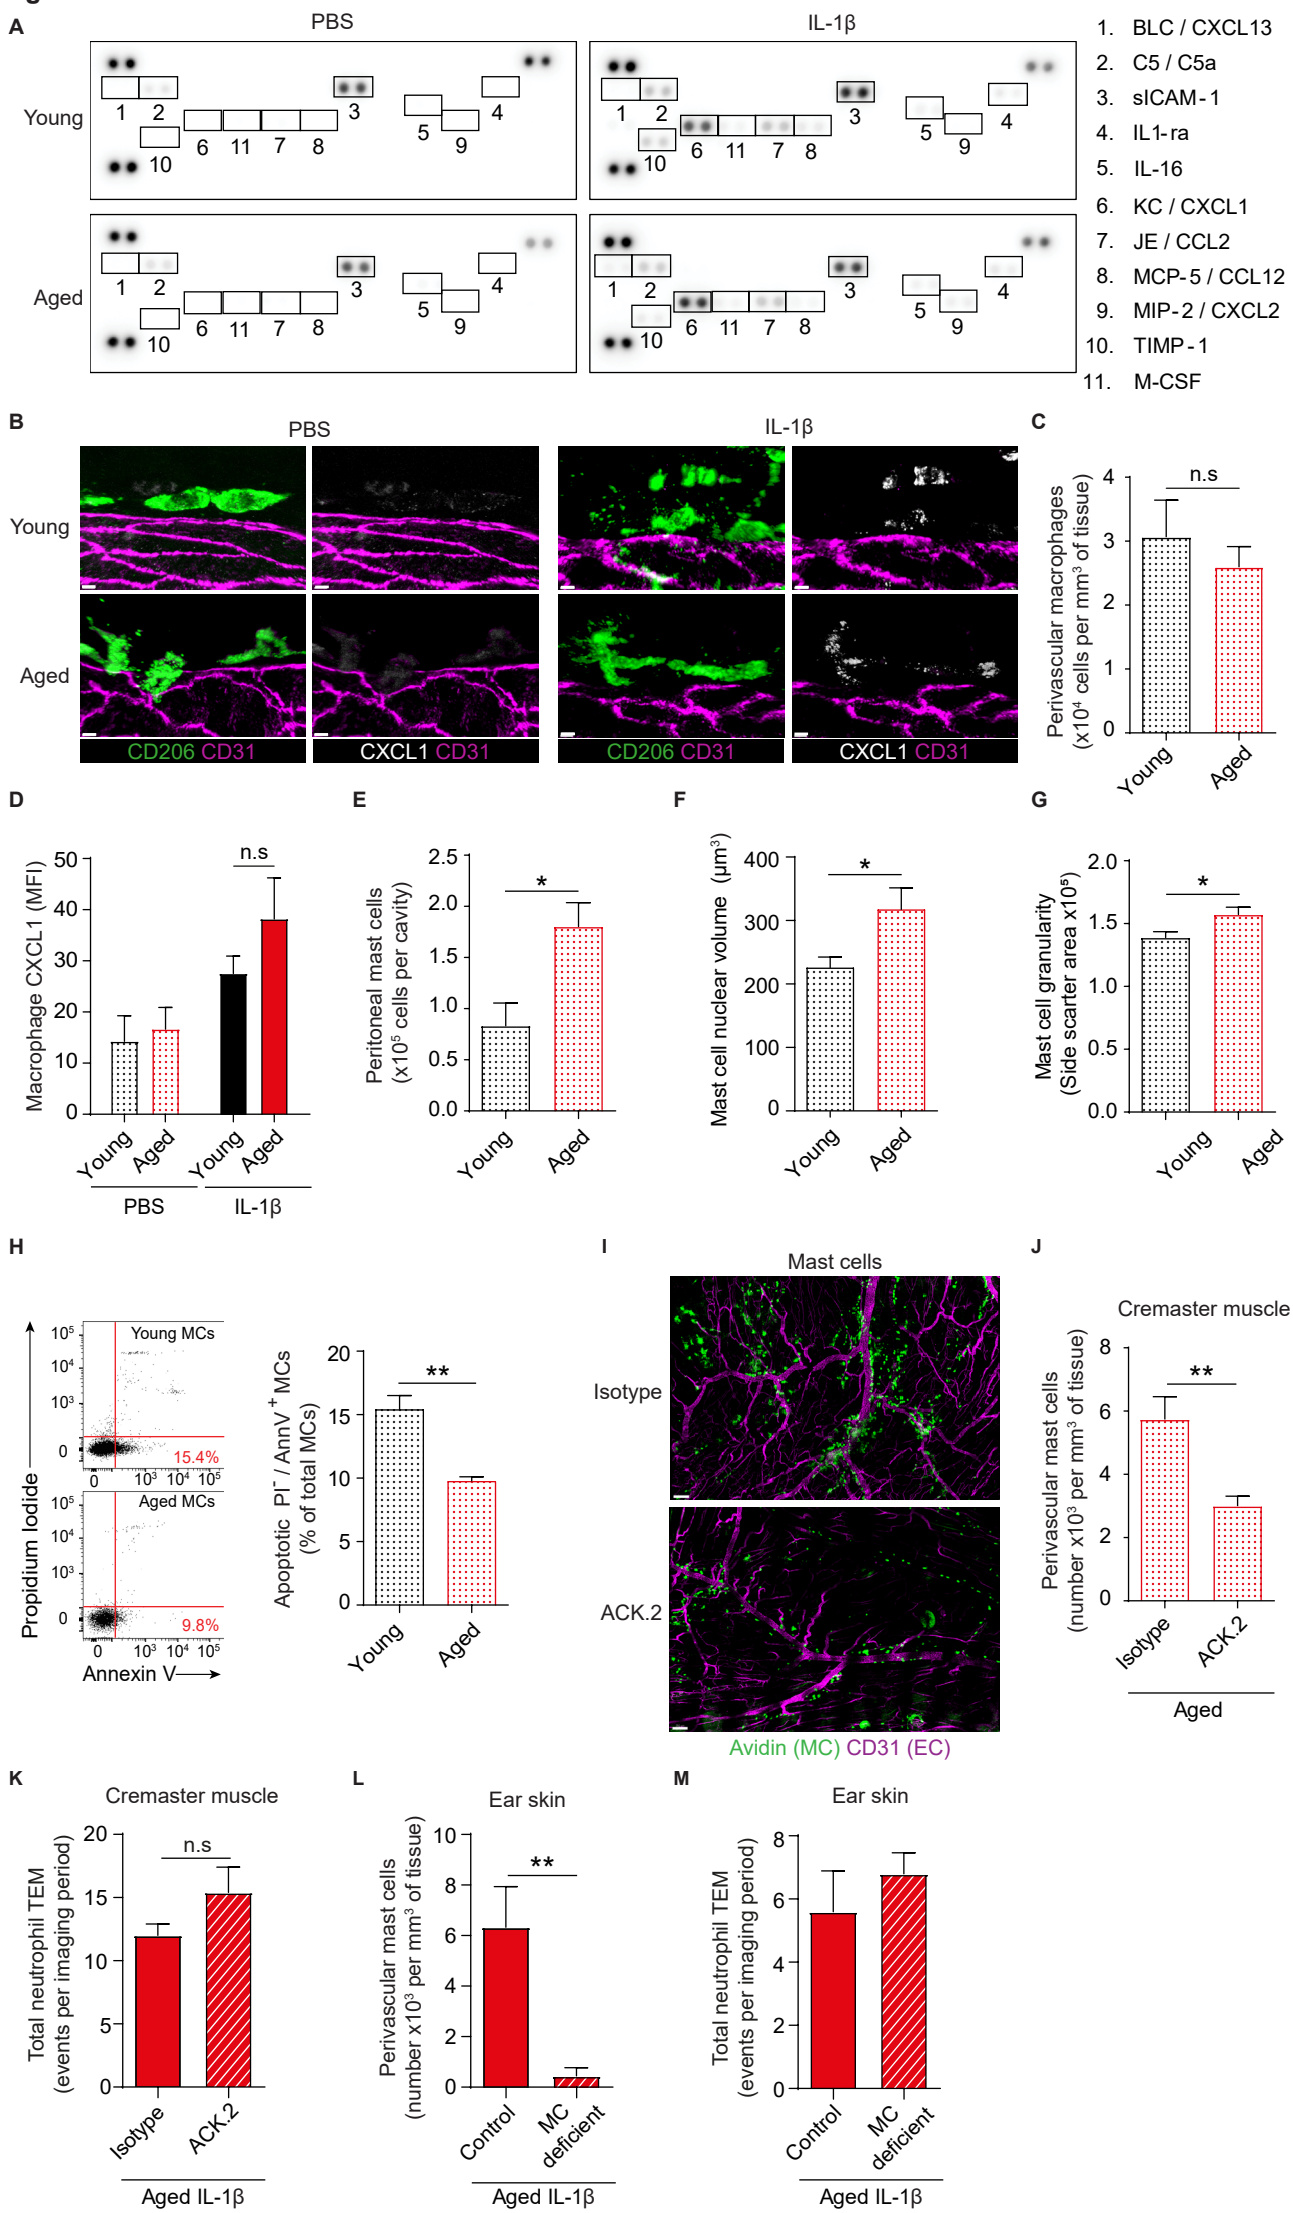

**Figure S2 (Related to Figure 2). Characterization of pro-inflammatory mediator generation and stromal cells in young and aged stimulated cremasteric tissues. (A-D)** Young and aged WT mice were stimulated i.s. with IL-1 $\beta$  or PBS for 4 h. **(A)** Inflammatory mediator detection by protein array in cremaster muscles (n=3 mice/condition). **(B)** Representative confocal images depicting CXCL1 expression by perivascular macrophages (CD206; scale bar: 5  $\mu$ m), **(C)** macrophage numbers associated with post-capillary venules and **(D)** immunoreactive CXCL1 expression (MFI) in these cells (n=4-6 mice/group). **(E)** Number of peritoneal mast cells (MCs) in naïve young and aged WT mice as assessed by flow cytometry (n=3-5 mice/group). **(F)** Quantification of MC nuclear volume in un-stimulated ear skins as assessed by confocal microscopy (n=3 mice/group). Peritoneal MCs acquired from un-stimulated young and aged mice assayed for **(G)** granularity (n=5 mice/group) and **(H)** apoptosis (n=6-7 mice/group), both by flow cytometry. **(I-K)** Aged WT mice were treated with anti-CD117 (ACK.2) mAb or isotype control for mast cell (MC) depletion. **(I)** Representative tile scan confocal images of the cremaster muscle microcirculation (scale bar: 300  $\mu$ m), **(J)** quantification of MCs (avidin) associated with post-capillary venules (CD31) (n=3-5 mice/group) and **(K)** total neutrophil TEM events in IL-1 $\beta$ -stimulated control or mast cell depleted aged mice. **(L)** Quantification of MC numbers associated with post-capillary venules in ear skins stained with avidin (MCs) and anti-CD31 mAb (ECs) and **(M)** total neutrophil TEM events in IL-1 $\beta$ -stimulated ear skin of MC deficient (*Mcpt5-Cre-R-DTA*) aged mice and their littermate controls (n=5-7 mice/group). Means  $\pm$  SEM, \*p<0.05, \*\*p<0.01, n.s. not significant as indicated.

**Figure S3**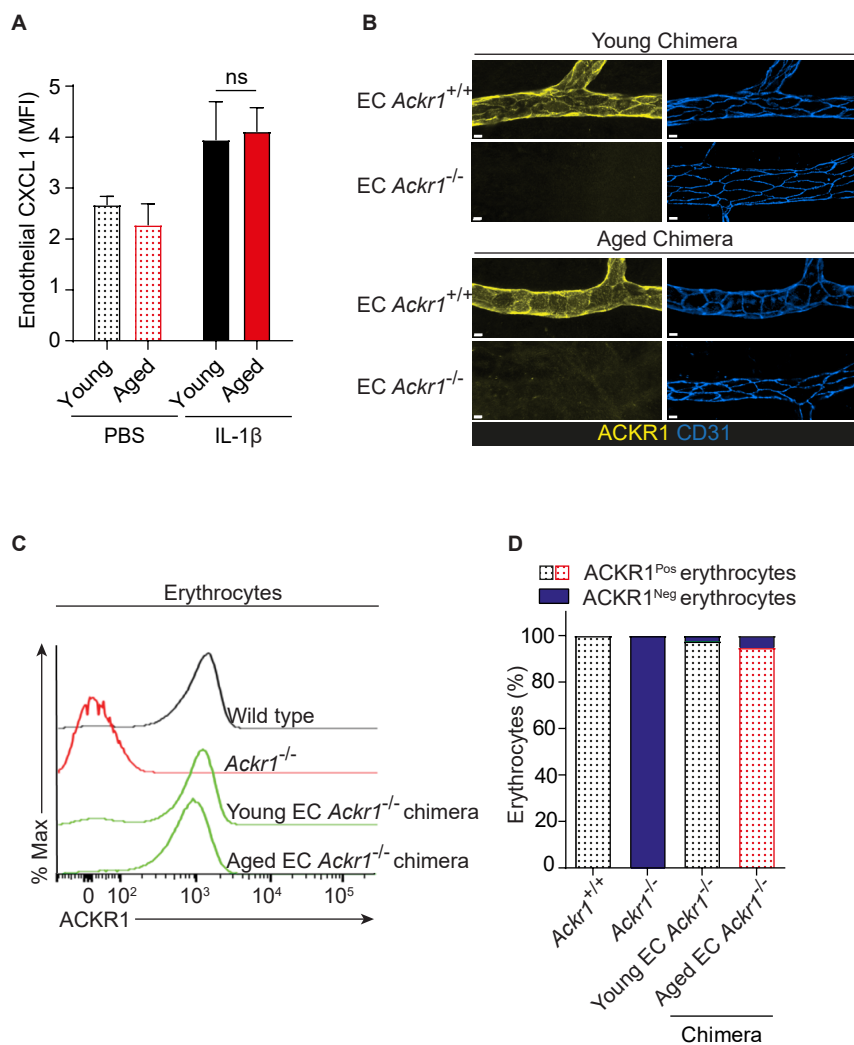

**Figure S3 (Related to Figure 3) EC CXCL1 expression and EC *Ackr1*<sup>-/-</sup> chimeric mice characterization.** (A) EC CXCL1 quantification (MFI) in young and aged mouse cremasteric post capillary venules (PCVs) treated with PBS or IL-1 $\beta$  (n = 6-7 mice/group). (B) Representative confocal images of ear skin PCVs immunostained for ACKR1 and CD31 from young and aged EC *Ackr1*<sup>+/+</sup> and EC *Ackr1*<sup>-/-</sup> chimeric mice (scale bar: 20  $\mu$ m). (C) Flow cytometry analysis of erythrocyte (Ter119<sup>+</sup>) ACKR1 expression and (D) relative percentages of ACKR1<sup>+</sup> and ACKR1<sup>-</sup> erythrocytes in peripheral blood of chimeric mice generated as described in Figure 3H (n=3-4 mice/group). Means  $\pm$  SEM, n.s. not significant as indicated.

**Figure S4****A**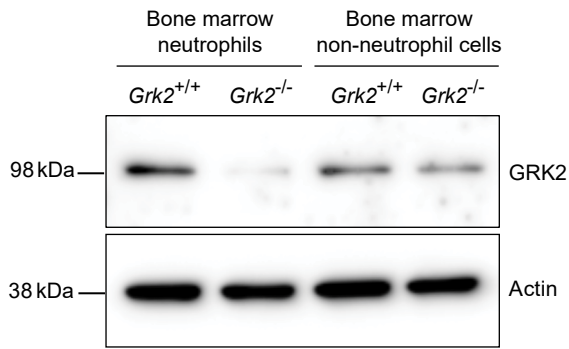**B**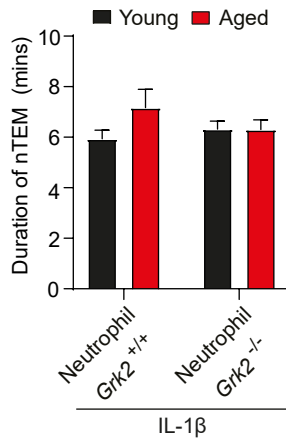

**Figure S4 (Related to Figure 4). Validation of neutrophil GRK2 deficiency and analysis of neutrophil TEM duration.** (A) GRK2 expression in purified bone marrow derived neutrophils and non-neutrophil cells of neutrophil *Grk2*<sup>+/+</sup> and *Grk2*<sup>-/-</sup> chimeric mice as analyzed by western blot (loading control: Actin). (B) Duration of neutrophil normal TEM (mins) as assessed by confocal IVM in IL-1 $\beta$ -stimulated cremaster muscles of young and aged neutrophil *Grk2*<sup>+/+</sup> and *Grk2*<sup>-/-</sup> chimeric mice (n=30-82 neutrophils analyzed/group). Means  $\pm$  SEM.

Figure S5

A

Aged IR injury

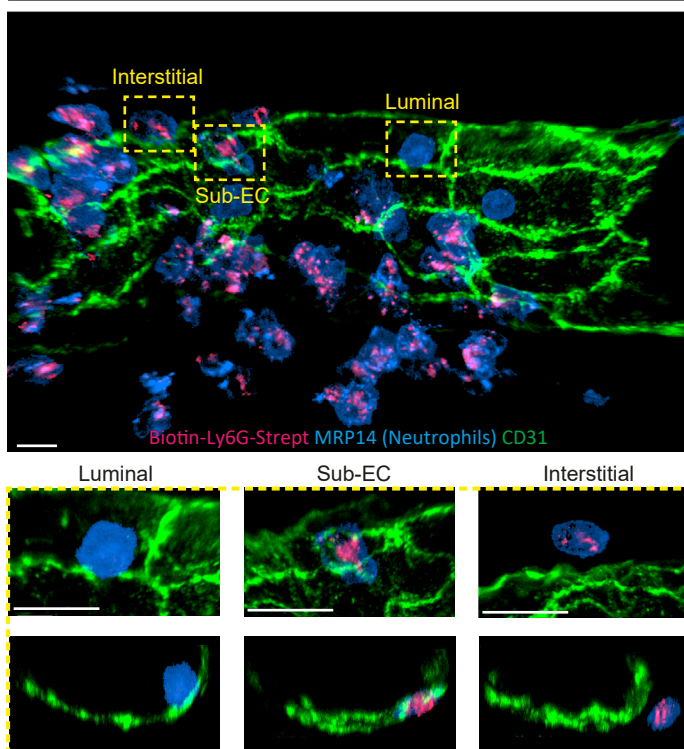

B

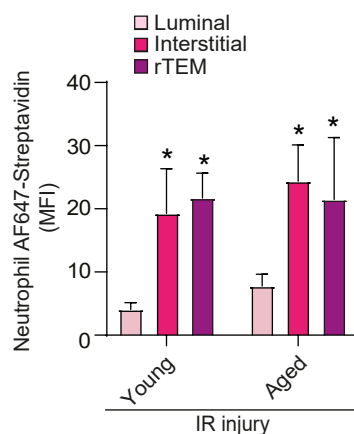

**Figure S5 (Related to Figure 5). Validation of biotin-Ly6G-AF647-Streptavidin cell tracking, as a method for specifically labelling neutrophils that have breached the endothelium.** Young and aged WT mice were injected i.v. with biotinylated anti-Ly6G mAb, subjected to sham or cremasteric IR injury and AF647-Strept was applied locally to cremaster muscles. **(A)** Representative confocal images of neutrophil AF647-Strept signal in the vascular lumen, subendothelial space and interstitium during IR injury in aged WT mice (dashed boxes delineate magnified areas; scale bar: 10  $\mu$ m). **(B)** AF647-Strept quantification (MFI) of neutrophils within the lumen, interstitial tissue, and cells undergoing rTEM in IR-stimulated cremaster muscles of young and aged *Lyz2-EGFP-ki* mice (n=3-4 mice/group). Means  $\pm$  SEM \*  $p < 0.05$  as compared to MFI of age-matched luminal neutrophils.

**Figure S6****A**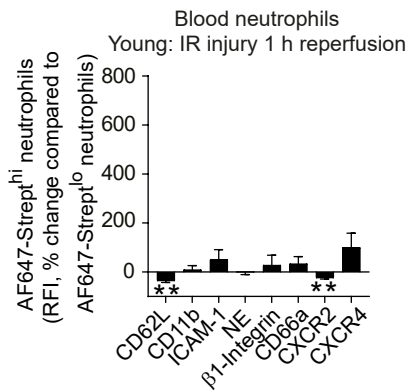**B**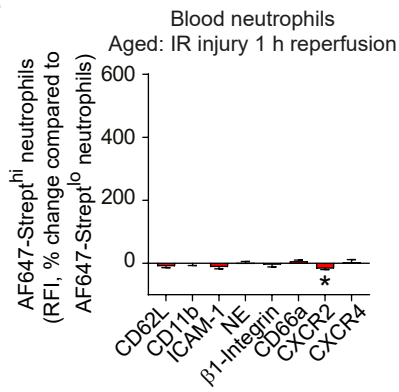**C**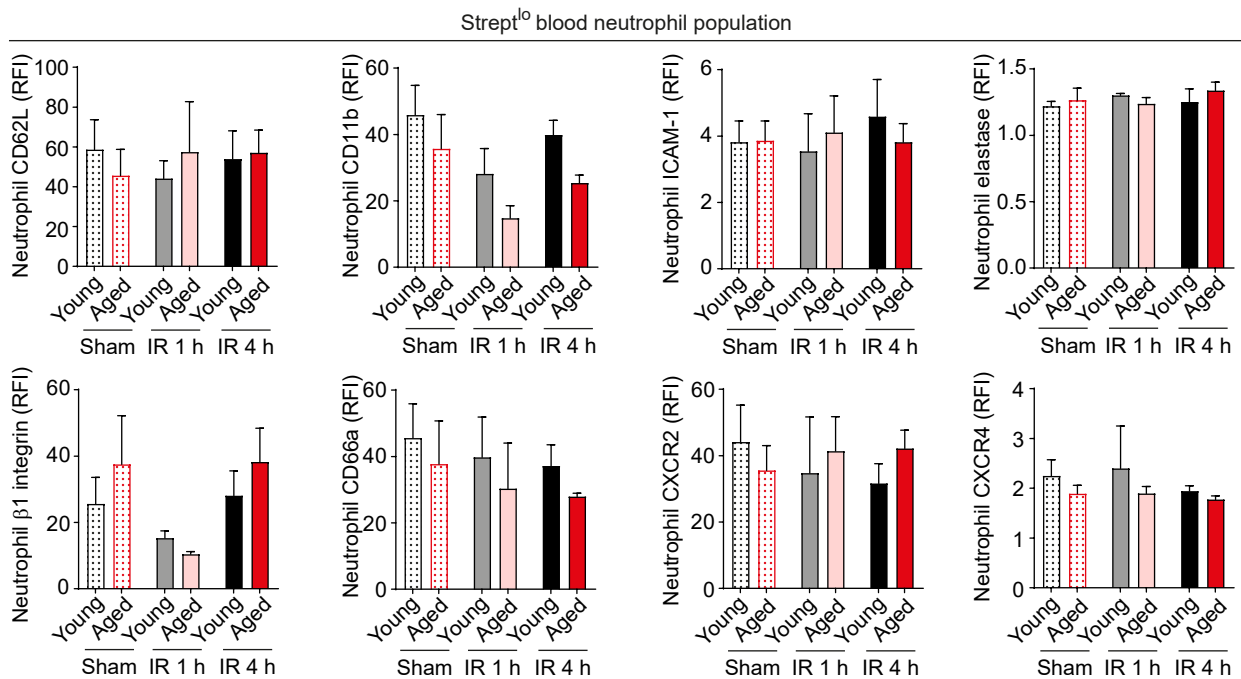**D**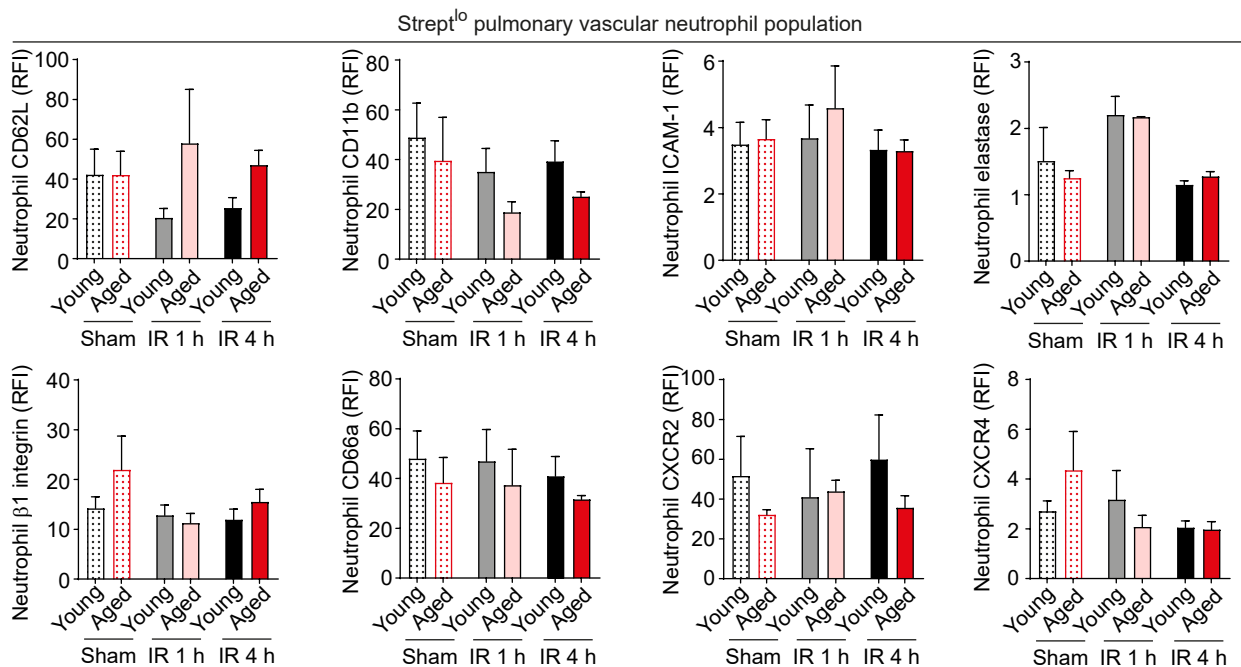



**Figure S6 (Related to Figure 6). Phenotypic analysis of AF647-Strept<sup>lo</sup> and AF647-Strept<sup>hi</sup> blood and pulmonary vascular neutrophils.** Young and aged WT mice were injected i.v. with biotinylated anti-Ly6G mAb, subjected to sham or cremasteric IR injury and AF647-Strept was applied locally to cremaster muscles. Relative expression levels of indicated markers on AF647-Strept<sup>hi</sup> neutrophils relative to levels on AF647-Strept<sup>lo</sup> neutrophils in the blood following 1 h reperfusion in **(A)** young and **(B)** aged IR-stimulated mice. Relative expression of indicated markers on AF647-Strept<sup>lo</sup> **(C)** blood neutrophils and **(D)** neutrophils from the pulmonary vasculature (n=5 mice/group). Means  $\pm$  SEM \*p<0.05, \*\*p<0.01 as compared to AF647-Strept<sup>lo</sup> neutrophils of the same group.

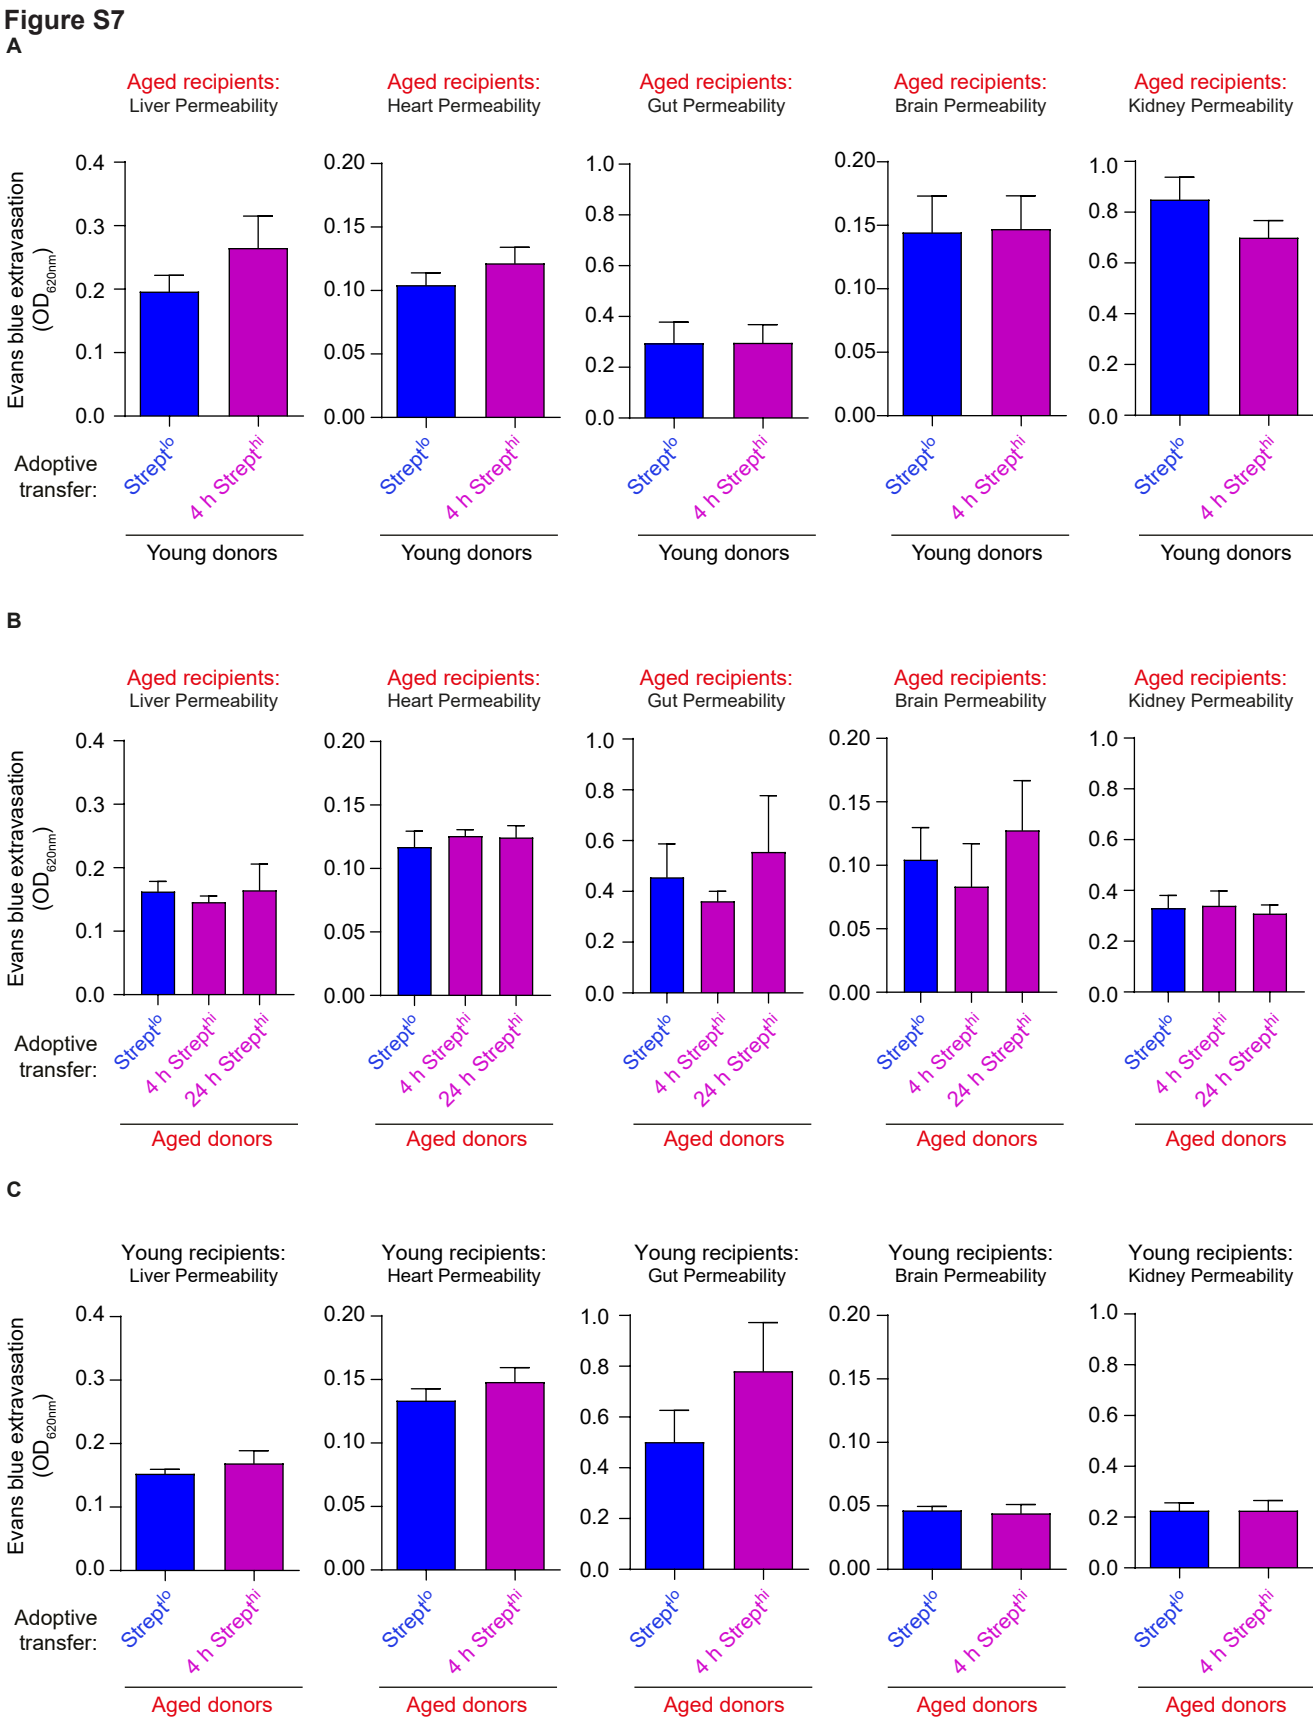

**Figure S7 (Related to Figure 6). Impact of AF647-Strept<sup>lo</sup> and AF647-Strept<sup>hi</sup> neutrophils on organ permeability.** Extravasation of i.v. Evans blue in multiple tissues of (A) aged recipients 4 h post i.v. injection of neutrophils sorted from young donors, (B) aged recipients 4 or 24 h post i.v. injection of neutrophils sorted from aged donors, and (C) young recipients 4 h post i.v. injection of neutrophils sorted from aged donors (n=4-7 mice/group). Means ± SEM.
